# Supplementary material
Source: Research Square preprint supplement (doi:10.21203/rs.3.rs-9080835/v1)
Supplement: Supplementary file 1 [file 0a5da9e8df83d3484a7e6fbb.xlsx]

## Sheet: Sheet1
Gene family	Gene	0h	1h	3h	6h	9h	24h	function
HSP70s	TRINITY_DN71321_c1_g3(HSP70-16)	1.159	1.9886	1.5534	2.64008	1.98015	10.5612	Heat shock 70 kDa protein 16 OS=Arabidopsis thaliana OX=3702 GN=HSP70-16 PE=2 SV=1
	TRINITY_DN65680_c2_g2(HSP70)	1.059	1.95259	2.07659	2.14025	1.34338	8.23112	Stromal 70 kDa heat shock-related protein, chloroplastic OS=Pisum sativum OX=3888 GN=HSP70 PE=2 SV=1
	TRINITY_DN38515_c0_g1(HSP70)	1.09777	3.4879	3.97661	3.56768	6.51596	8.01089	Heat shock 70 kDa protein OS=Glycine max OX=3847 GN=HSP70 PE=3 SV=1
	TRINITY_DN65680_c2_g1( HSP70)	2.24823	4.07173	6.09605	4.59182	6.34683	10.1946	Stromal 70 kDa heat shock-related protein, chloroplastic OS=Pisum sativum OX=3888 GN=HSP70 PE=2 SV=1
	TRINITY_DN70653_c2_g2( HSP68)	311.207	2110.15	2656.67	3059.91	2911.4	1260.12	22.7 kDa class IV heat shock protein OS=Pisum sativum OX=3888 GN=HSP22.7 PE=2 SV=1
	TRINITY_DN34453_c0_g1( HSP68)	1.55572	2.92234	5.06546	5.28075	3.20344	5.12106	Heat shock 70 kDa protein, mitochondrial OS=Solanum tuberosum OX=4113 GN=HSP68 PE=2 SV=1
	TRINITY_DN19160_c0_g1(HSP70-17)	16.7742	60.1453	55.3694	63.8029	37.3531	52.6075	Heat shock 70 kDa protein 17 OS=Arabidopsis thaliana OX=3702 GN=HSP70-17 PE=2 SV=1
	TRINITY_DN71321_c1_g1(HSP70-16)	3.75098	4.41344	3.75441	4.45322	4.37336	11.1883	Heat shock 70 kDa protein 16 OS=Arabidopsis thaliana OX=3702 GN=HSP70-16 PE=2 SV=1
	TRINITY_DN46563_c0_g2(HSP70-15)	15.4962	21.0797	18.8091	21.6713	18.6029	41.8075	Heat shock 70 kDa protein 15 OS=Arabidopsis thaliana OX=3702 GN=HSP70-15 PE=1 SV=1
	TRINITY_DN70937_c1_g1(HSP70-17)	12.2851	46.4902	33.2284	39.4439	44.985	31.1682	Heat shock 70 kDa protein 17 OS=Arabidopsis thaliana OX=3702 GN=HSP70-17 PE=2 SV=1
	TRINITY_DN90874_c0_g1(HSP70-15)	66.9827	110.447	69.6669	107.089	101.978	159.144	Heat shock 70 kDa protein 15 OS=Arabidopsis thaliana OX=3702 GN=HSP70-15 PE=1 SV=1
	TRINITY_DN46563_c0_g1(HSP70-14)	19.9556	20.1147	18.042	21.3717	19.8693	35.0975	Heat shock 70 kDa protein 14 OS=Arabidopsis thaliana OX=3702 GN=HSP70-14 PE=1 SV=1
	TRINITY_DN93680_c0_g1(HSP70-15)	8.85785	8.5403	9.29266	9.91891	11.7373	13.8989	Heat shock 70 kDa protein 15 OS=Arabidopsis thaliana OX=3702 GN=HSP70-15 PE=1 SV=1
	TRINITY_DN69070_c2_g7(HSP68)	19.8777	50.7234	35.4052	38.2505	53.7233	30.0356	Heat shock 70 kDa protein, mitochondrial OS=Solanum tuberosum OX=4113 GN=HSP68 PE=2 SV=1
	TRINITY_DN71321_c1_g5(70-16)	9.5203	4.33188	5.19996	4.37305	5.72166	14.3116	Heat shock 70 kDa protein 16 OS=Arabidopsis thaliana OX=3702 GN=HSP70-16 PE=2 SV=1
	TRINITY_DN34409_c0_g1(HSP70-14)	7.64357	8.93903	9.97182	12.9885	10.7934	10.8295	Heat shock 70 kDa protein 14 OS=Arabidopsis thaliana OX=3702 GN=HSP70-14 PE=1 SV=1
	TRINITY_DN64639_c1_g1(HSP70-17)	2.62653	1.32621	1.29745	1.73858	1.20438	3.58391	Heat shock 70 kDa protein 17 OS=Arabidopsis thaliana OX=3702 GN=HSP70-17 PE=2 SV=1
	TRINITY_DN72475_c3_g8(HSP70)	3.20804	3.0519	3.83251	2.47397	3.12133	4.13204	Stromal 70 kDa heat shock-related protein, chloroplastic OS=Pisum sativum OX=3888 GN=HSP70 PE=2 SV=1
	TRINITY_DN72233_c1_g2(HSP70)	1016.01	3541.08	4471.75	4482.7	4801.5	1258.52	Heat shock cognate 70 kDa protein OS=Petunia hybrida OX=4102 GN=HSP70 PE=2 SV=1
	TRINITY_DN65680_c2_g8(HSP70)	242.476	192.686	186.645	193.733	178.207	271.576	Stromal 70 kDa heat shock-related protein, chloroplastic OS=Pisum sativum OX=3888 GN=HSP70 PE=2 SV=1
	TRINITY_DN52562_c0_g1(HSP70)	222.305	564.765	647.495	659.931	639.814	229.948	Stromal 70 kDa heat shock-related protein, chloroplastic OS=Pisum sativum OX=3888 GN=HSP70 PE=2 SV=1
	TRINITY_DN50880_c0_g1(HSP70-16)	2.06778	2.16702	1.77697	2.16588	1.53552	2.12653	Heat shock 70 kDa protein 16 OS=Arabidopsis thaliana OX=3702 GN=HSP70-16 PE=2 SV=1
	TRINITY_DN64639_c1_g2(HSP70-17)	2.41511	1.27798	1.2613	2.05097	1.90482	1.95323	Heat shock 70 kDa protein 17 OS=Arabidopsis thaliana OX=3702 GN=HSP70-17 PE=2 SV=1
	TRINITY_DN68834_c0_g6(HSP70)	236.267	180.395	209.611	192.595	193.594	167.156	Stromal 70 kDa heat shock-related protein, chloroplastic OS=Pisum sativum OX=3888 GN=HSP70 PE=2 SV=1
	TRINITY_DN63433_c1_g1(HSP70-8)	30.6647	29.5025	24.9507	22.5793	20.4822	20.3846	Heat shock 70 kDa protein 8 OS=Arabidopsis thaliana OX=3702 GN=HSP70-8 PE=1 SV=1
	TRINITY_DN69164_c1_g1(HSP70-14)	172.316	139.927	89.4447	132.509	151.576	106.245	Heat shock 70 kDa protein 14 OS=Arabidopsis thaliana OX=3702 GN=HSP70-14 PE=1 SV=1
	TRINITY_DN64639_c1_g5(HSP70-17)	5.29862	1.57398	1.09909	1.53849	1.7814	2.96842	Heat shock 70 kDa protein 17 OS=Arabidopsis thaliana OX=3702 GN=HSP70-17 PE=2 SV=1
	TRINITY_DN22416_c0_g3(HSP70)	670.239	1269.9	1265.85	1235.39	1299.15	310.816	Heat shock cognate 70 kDa protein OS=Petunia hybrida OX=4102 GN=HSP70 PE=2 SV=1
	TRINITY_DN62811_c0_g1(HSP70-6)	168.491	127.011	160.25	128.231	132.941	77.2873	Heat shock 70 kDa protein 6, chloroplastic OS=Arabidopsis thaliana OX=3702 GN=HSP70-6 PE=1 SV=1
	TRINITY_DN72233_c1_g3(HSP70)	493.88	993.591	1403.87	1081.65	1269.65	218.123	Heat shock cognate 70 kDa protein OS=Petunia hybrida OX=4102 GN=HSP70 PE=2 SV=1
	TRINITY_DN66011_c0_g1(HSP70)	2844.94	5336.78	6135.87	5056.26	6065.97	1220.67	Heat shock 70 kDa protein OS=Glycine max OX=3847 GN=HSP70 PE=3 SV=1
	TRINITY_DN11289_c0_g1(HSP70)	190.206	487.617	774.987	483.841	484.178	74.1682	Heat shock cognate 70 kDa protein OS=Petunia hybrida OX=4102 GN=HSP70 PE=2 SV=1
	TRINITY_DN73666_c0_g2(HSP70-6)	49.3275	31.022	38.4725	29.8738	31.7843	16.8995	Heat shock 70 kDa protein 6, chloroplastic OS=Arabidopsis thaliana OX=3702 GN=HSP70-6 PE=1 SV=1
	TRINITY_DN1125_c0_g1(HSP68)	12.5828	11.1532	16.3383	8.9698	7.20981	4.19462	Heat shock 70 kDa protein, mitochondrial OS=Solanum tuberosum OX=4113 GN=HSP68 PE=2 SV=1
	TRINITY_DN7784_c0_g1(HSP70)	67.7752	39.0965	39.9832	38.7945	41.4137	21.5459	Stromal 70 kDa heat shock-related protein, chloroplastic OS=Pisum sativum OX=3888 GN=HSP70 PE=2 SV=1
	TRINITY_DN38160_c0_g1(HSP68)	12.6532	4.72137	7.42359	6.39232	4.28434	2.28639	Heat shock 70 kDa protein, mitochondrial OS=Solanum tuberosum OX=4113 GN=HSP68 PE=2 SV=1
	TRINITY_DN90392_c0_g1(HSP70)	508.923	288.592	208.913	232.825	192.831	65.484	Heat shock 70 kDa protein OS=Glycine max OX=3847 GN=HSP70 PE=3 SV=1
	TRINITY_DN65760_c3_g3(HSP70-3)	758.57	357.532	356.677	346.146	287.938	83.396	Heat shock 70 kDa protein 3 OS=Arabidopsis thaliana OX=3702 GN=HSP70-3 PE=1 SV=1
	TRINITY_DN87390_c0_g1(HSP70-7)	56.2042	31.3559	37.1184	26.5655	13.9065	3.99355	Heat shock 70 kDa protein 7, chloroplastic OS=Arabidopsis thaliana OX=3702 GN=HSP70-7 PE=2 SV=1
	TRINITY_DN13347_c0_g1(HSP70-7)	54.4021	32.018	44.3538	30.5214	17.649	3.13393	Heat shock 70 kDa protein 7, chloroplastic OS=Arabidopsis thaliana OX=3702 GN=HSP70-7 PE=2 SV=1
sHSPs	TRINITY_DN62394_c2_g6(HSP26.7)	4.23109	72.8417	166.96	234.814	237.991	86.8375	26.7 kDa heat shock protein, chloroplastic OS=Oryza sativa subsp. japonica OX=39947 GN=HSP26.7 PE=2 SV=1
	TRINITY_DN57640_c0_g1(HSP22.0)	1.08905	1.12793	1.50438	4.39354	6.18731	23.9488	22.0 kDa class IV heat shock protein OS=Glycine max OX=3847 GN=HSP22.0 PE=3 SV=1
	TRINITY_DN50113_c0_g1)(HSPR02)	5.82546	11.7098	8.95871	17.0424	8.73226	56.6321	Nematode resistance protein-like HSPRO2 OS=Arabidopsis thaliana OX=3702 GN=HSPRO2 PE=1 SV=1
	TRINITY_DN68816_c1_g1( HSP16.0)	2.55405	20.2851	27.8093	30.2911	28.9356	12.8801	16.0 kDa heat shock protein, peroxisomal OS=Oryza sativa subsp. japonica OX=39947 GN=HSP16.0 PE=2 SV=1
	TRINITY_DN65680_c3_g1(HSP18.1)	4.39932	10.6294	13.4833	13.417	10.7336	11.7056	18.1 kDa class I heat shock protein OS=Oryza sativa subsp. japonica OX=39947 GN=HSP18.1 PE=2 SV=1
	TRINITY_DN23851_c0_g1(HSP18.1)	69.1757	132.272	104.295	161.094	145.152	182.19	Heat shock 70 kDa protein 15 OS=Arabidopsis thaliana OX=3702 GN=HSP70-15 PE=1 SV=1
	TRINITY_DN68971_c0_g1(HSP22.0)	206.971	895.669	1070.14	1096.51	1194.51	420.83	22.0 kDa class IV heat shock protein OS=Glycine max OX=3847 GN=HSP22.0 PE=3 SV=1
	TRINITY_DN72614_c8_g1(HSP18.2)	139.045	378.585	435.099	486.015	493.37	281.048	18.2 kDa class I heat shock protein OS=Medicago sativa OX=3879 GN=HSP18.2 PE=2 SV=1
	TRINITY_DN45154_c0_g3(HSP16.0)	6.69381	7.64082	10.7019	11.4867	12.7609	12.0284	16.0 kDa heat shock protein, peroxisomal OS=Oryza sativa subsp. japonica OX=39947 GN=HSP16.0 PE=2 SV=1
	TRINITY_DN40543_c0_g1(HSP18.8)	13.8804	26.3653	41.1765	27.4149	22.3804	17.1391	18.8 kDa class V heat shock protein OS=Oryza sativa subsp. japonica OX=39947 GN=HSP18.8 PE=2 SV=1
	TRINITY_DN10937_c0_g1(HSP22.3)	31.8212	36.4053	34.9443	49.1484	24.8993	39.0104	22.3 kDa class VI heat shock protein OS=Oryza sativa subsp. japonica OX=39947 GN=HSP22.3 PE=2 SV=1
	TRINITY_DN71921_c1_g6(HSP23)	360.914	568.949	578.572	519.799	711.909	382.906	Small heat shock protein, chloroplastic OS=Oxybasis rubra OX=3560 GN=HSP23 PE=2 SV=1
	TRINITY_DN68816_c1_g5(HSP16.0)	147.644	378.902	386.898	367.967	339.856	150.284	16.0 kDa heat shock protein, peroxisomal OS=Oryza sativa subsp. japonica OX=39947 GN=HSP16.0 PE=2 SV=1
	TRINITY_DN34335_c0_g1(HSP23.9)	336.952	548.25	441.079	541.84	586.98	339.369	Heat shock 22 kDa protein, mitochondrial OS=Glycine max OX=3847 GN=HSP23.9 PE=2 SV=1
	TRINITY_DN50149_c0_g1(HSP22)	318.864	550.316	526.726	472.161	751.103	307.591	Heat shock 22 kDa protein, mitochondrial OS=Pisum sativum OX=3888 GN=HSP22 PE=2 SV=1
	TRINITY_DN61562_c0_g1(HSP18.1)	236.28	363.002	340.603	423.826	539.384	225.269	18.1 kDa class I heat shock protein OS=Pisum sativum OX=3888 GN=HSP18.1 PE=1 SV=1
	TRINITY_DN938_c0_g1(HSP17.4A)	1157.37	2441.68	2834.12	2880.23	3051.22	999.751	17.4 kDa class I heat shock protein OS=Arabidopsis thaliana OX=3702 GN=HSP17.4A PE=1 SV=2
	TRINITY_DN52766_c0_g1(HSP22)	364.991	1010.98	869.473	1004.97	1007.24	300.304	Small heat shock protein, chloroplastic (Fragment) OS=Glycine max OX=3847 GN=HSP22 PE=2 SV=1
	TRINITY_DN59384_c2_g1(HSP21)	218.097	762.754	870.992	803.506	873.603	167.435	Small heat shock protein, chloroplastic OS=Solanum lycopersicum OX=4081 GN=HSP21 PE=2 SV=1
	TRINITY_DN59384_c2_g3(HSP21)	269.198	819.144	832.403	874.261	839.855	203.704	Small heat shock protein, chloroplastic OS=Solanum lycopersicum OX=4081 GN=HSP21 PE=2 SV=1
	TRINITY_DN71921_c1_g5(HSP22)	51.325	61.8643	39.8414	52.1108	73.5282	37.7347	Heat shock 22 kDa protein, mitochondrial OS=Pisum sativum OX=3888 GN=HSP22 PE=2 SV=1
	TRINITY_DN71921_c1_g2(HSP23.6)	243.148	270.352	278.729	258.205	301.742	127.378	23.6 kDa heat shock protein, mitochondrial OS=Arabidopsis thaliana OX=3702 GN=HSP23.6 PE=2 SV=1
	TRINITY_DN7182_c0_g1(HSP17.6C)	901.954	1464.2	1786.91	1713.91	1743.76	447.203	17.6 kDa class I heat shock protein 3 OS=Arabidopsis thaliana OX=3702 GN=HSP17.6C PE=2 SV=2
	TRINITY_DN20844_c0_g1(HSP16.9B)	132.031	85.2408	81.7164	90.1885	60.8047	62.9922	16.9 kDa class I heat shock protein 2 OS=Triticum aestivum OX=4565 GN=hsp16.9B PE=1 SV=1
	TRINITY_DN70653_c2_g1(HSP21.9)	217.076	270.258	273.023	244.872	343.437	103.18	21.9 kDa heat shock protein OS=Oryza sativa subsp. japonica OX=39947 GN=HSP21.9 PE=2 SV=1
	TRINITY_DN15277_c0_g1(HSP18.2)	707.14	1087.03	965.918	1061.63	1093	327.268	18.2 kDa class I heat shock protein OS=Medicago sativa OX=3879 GN=HSP18.2 PE=2 SV=1
	TRINITY_DN68816_c1_g6(HSP16.0)	185.495	149.618	94.4011	125.415	122.88	83.0202	16.0 kDa heat shock protein, peroxisomal OS=Oryza sativa subsp. japonica OX=39947 GN=HSP16.0 PE=2 SV=1
	TRINITY_DN15479_c0_g1(HSP17.5)	71.4966	55.1834	45.3918	49.3486	35.127	21.524	17.5 kDa class I heat shock protein OS=Glycine max OX=3847 GN=HSP17.5-M PE=3 SV=1
	TRINITY_DN35820_c0_g3(HSP17.9)	1355.66	911.727	839.286	837.32	798.694	258.479	17.9 kDa class II heat shock protein OS=Glycine max OX=3847 GN=HSP17.9-D PE=3 SV=1
	TRINITY_DN68816_c1_g2(HSP16.0)	42.5048	13.7816	9.29479	6.07599	9.75793	6.91802	16.0 kDa heat shock protein, peroxisomal OS=Oryza sativa subsp. japonica OX=39947 GN=HSP16.0 PE=2 SV=1
	TRINITY_DN66646_c2_g4(HSP18.2)	20.3039	12.6289	4.39207	5.74336	6.9468	2.74984	18.2 kDa class I heat shock protein OS=Medicago sativa OX=3879 GN=HSP18.2 PE=2 SV=1
	TRINITY_DN22528_c0_g1(HSP18.6)	459.636	249.606	285.543	201.834	172.936	40.783	18.6 kDa class III heat shock protein OS=Oryza sativa subsp. japonica OX=39947 GN=HSP18.6 PE=2 SV=1
HSP90s	TRINITY_DN71807_c0_g1(HSP90-6)	21.1144	33.0424	32.2357	39.6122	29.0444	41.9149	Heat shock protein 90-6, mitochondrial OS=Arabidopsis thaliana OX=3702 GN=HSP90-6 PE=1 SV=1
	TRINITY_DN76694_c0_g1(HSP82)	65.4198	233.339	210.437	282.009	276.858	119.423	Heat shock protein 82 (Fragment) OS=Nicotiana tabacum OX=4097 GN=HSP82 PE=2 SV=1
	TRINITY_DN21314_c0_g1(HSP90)	182.376	683.522	658.014	578.655	478.934	317.922	Endoplasmin homolog OS=Catharanthus roseus OX=4058 GN=HSP90 PE=2 SV=1
	TRINITY_DN37689_c0_g2(HSP22.0)	28.2737	115.74	122.058	137.951	127.281	44.725	22.0 kDa class IV heat shock protein OS=Glycine max OX=3847 GN=HSP22.0 PE=3 SV=1
	TRINITY_DN71005_c2_g1(HSP82)	237.137	721.351	639.32	841.808	775.389	359.683	Heat shock protein 82 (Fragment) OS=Nicotiana tabacum OX=4097 GN=HSP82 PE=2 SV=1
	TRINITY_DN71005_c4_g4(HSP83A)	240.402	759.865	945.686	984.272	1018.66	291.175	Heat shock protein 83 OS=Ipomoea nil OX=35883 GN=HSP83A PE=2 SV=1
	TRINITY_DN69491_c5_g1(HSP90-1)	255.538	692.075	957.807	960.306	977.045	297.076	Heat shock protein 90-1 OS=Arabidopsis thaliana OX=3702 GN=HSP90-1 PE=1 SV=3
	TRINITY_DN41016_c1_g1(HSP81-3)	1.77662	2.14687	2.81731	3.46327	3.58086	1.92287	Heat shock protein 81-3 OS=Oryza sativa subsp. japonica OX=39947 GN=HSP81-3 PE=1 SV=2
	TRINITY_DN71333_c1_g1(HSP90-5)	44.5288	84.1659	94.1174	80.9099	70.2809	47.2886	Heat shock protein 90-5, chloroplastic OS=Arabidopsis thaliana OX=3702 GN=HSP90-5 PE=1 SV=1
	TRINITY_DN476_c0_g1(HSP90)	67.4908	175.422	181.516	169.517	123.056	68.5152	Endoplasmin homolog OS=Catharanthus roseus OX=4058 GN=HSP90 PE=2 SV=1
	TRINITY_DN71333_c1_g2(HSP90-5)	30.271	32.1992	48.7927	39.5862	29.3177	20.7478	Heat shock protein 90-5, chloroplastic OS=Arabidopsis thaliana OX=3702 GN=HSP90-5 PE=1 SV=1
	TRINITY_DN60058_c0_g2(HSP81-1)	69.8591	52.0019	32.8226	47.3326	48.5708	44.7272	Heat shock protein 81-1 OS=Oryza sativa subsp. japonica OX=39947 GN=HSP81-1 PE=3 SV=2
	TRINITY_DN59745_c0_g2(HSP18.5-C)	14407.8	18928.2	21292.2	21722	22229.8	8837.66	18.5 kDa class I heat shock protein OS=Glycine max OX=3847 GN=HSP18.5-C PE=3 SV=1
	TRINITY_DN29173_c0_g1(HSP90-3)	83.4434	82.6663	41.4584	52.2152	66.8615	47.7604	Heat shock protein 90-3 OS=Arabidopsis thaliana OX=3702 GN=HSP90-3 PE=1 SV=2
	TRINITY_DN64125_c1_g1(HSP81-1)	112.202	89.9625	60.6044	72.7672	90.08	55.9225	Heat shock protein 81-1 OS=Oryza sativa subsp. japonica OX=39947 GN=HSP81-1 PE=3 SV=2
	TRINITY_DN67263_c1_g1(HSP81-3)	15.0842	20.1153	29.7981	23.4265	24.4675	6.62123	Heat shock protein 81-3 OS=Oryza sativa subsp. japonica OX=39947 GN=HSP81-3 PE=1 SV=2
	TRINITY_DN19476_c0_g1(HSP81-1)	219.712	146.564	151.759	138.644	169.556	93.6913	Heat shock protein 81-1 OS=Oryza sativa subsp. japonica OX=39947 GN=HSP81-1 PE=3 SV=2
	TRINITY_DN53606_c0_g1(HSP8-3)	26.9715	19.4186	16.4639	17.8513	23.2681	11.3566	Heat shock protein 81-3 OS=Oryza sativa subsp. japonica OX=39947 GN=HSP81-3 PE=1 SV=2
	TRINITY_DN64125_c1_g2(HSP81-1)	341.228	236	188.916	201.549	236.018	142.438	Heat shock protein 81-1 OS=Oryza sativa subsp. japonica OX=39947 GN=HSP81-1 PE=3 SV=2
	TRINITY_DN60058_c0_g6(HSP90-3)	60.0852	42.4014	28.033	31.3661	31.2032	23.5999	Heat shock protein 90-3 OS=Arabidopsis thaliana OX=3702 GN=HSP90-3 PE=1 SV=2
	TRINITY_DN87102_c0_g1(HSP90-1)	38.117	157.962	223.574	140.831	106.317	14.3816	Heat shock protein 90-1 OS=Arabidopsis thaliana OX=3702 GN=HSP90-1 PE=1 SV=3
	TRINITY_DN47038_c1_g1(HSP81-1)	239.867	173.105	149.591	141.358	200.954	89.6991	Heat shock protein 81-1 OS=Oryza sativa subsp. japonica OX=39947 GN=HSP81-1 PE=3 SV=2
	TRINITY_DN50738_c0_g1(HSP90-6)	3.90011	2.17576	3.69571	3.66979	2.01466	1.42239	Heat shock protein 90-6, mitochondrial OS=Arabidopsis thaliana OX=3702 GN=HSP90-6 PE=1 SV=1
	TRINITY_DN38441_c0_g1(HSP81-3)	178.766	201.065	276.111	205.261	185.171	54.2382	Heat shock protein 81-3 OS=Oryza sativa subsp. japonica OX=39947 GN=HSP81-3 PE=1 SV=2
	TRINITY_DN16102_c0_g1(HSP81-3)	7.55446	3.73516	4.35804	5.58306	4.81896	1.95777	Heat shock protein 81-3 OS=Oryza sativa subsp. japonica OX=39947 GN=HSP81-3 PE=1 SV=2
	TRINITY_DN71005_c4_g2(HSP81-3)	718.256	549.672	395.295	415.556	376.815	160.272	Heat shock protein 81-3 OS=Oryza sativa subsp. japonica OX=39947 GN=HSP81-3 PE=1 SV=2
	TRINITY_DN67487_c8_g8(HSP90-1)	13.7822	18.2766	24.4797	15.3535	9.03473	2.93988	Heat shock protein 90-1 OS=Arabidopsis thaliana OX=3702 GN=HSP90-1 PE=1 SV=3
	TRINITY_DN71005_c4_g5(HSP81-1)	534.67	382.968	318.891	330.126	287.195	105.135	Heat shock protein 81-1 OS=Oryza sativa subsp. japonica OX=39947 GN=HSP81-1 PE=3 SV=2
	TRINITY_DN56090_c0_g1(HSP81-3)	10.497	9.93274	7.77957	8.52491	9.82884	1.9845	Heat shock protein 81-3 OS=Oryza sativa subsp. japonica OX=39947 GN=HSP81-3 PE=1 SV=2
	TRINITY_DN73789_c0_g1(HSP81-3)	19.136	5.97674	8.18333	6.969	7.65702	2.34522	Heat shock protein 81-3 OS=Oryza sativa subsp. japonica OX=39947 GN=HSP81-3 PE=1 SV=2
	TRINITY_DN65305_c0_g1(HSP81-3)	19.2071	6.91648	10.8983	9.09647	10.3896	1.54068	Heat shock protein 81-3 OS=Oryza sativa subsp. japonica OX=39947 GN=HSP81-3 PE=1 SV=2
	TRINITY_DN23824_c0_g1(HSP81-3)	29.3487	20.637	30.4422	15.9481	11.0954	1.45773	Heat shock protein 81-3 OS=Oryza sativa subsp. japonica OX=39947 GN=HSP81-3 PE=1 SV=2
