# Supplementary material
Source: Research Square preprint supplement (doi:10.21203/rs.3.rs-9080835/v1)
Supplement: Supplementary file 1 [file 295523a05d930eb1f1ea6155.docx]

The Primer Design of qRT-PCR.

| Gene ID(Gene name ) | Primer Sequence | prodSize (bp) |
| --- | --- | --- |
| TRINITY_DN79847_c0_g1(CHS2) | F:ACCACGTCGAGAACCTTGTC | 114 |
|  | R:CAAATATCACGCGCTCCTGC |
| TRINITY_DN40543_c0_g1(HSP18.8) | F:TCCTATCAATGCCGACGTCG | 92 |
|  | R:GGAGGTAGAAGACTCCCGGT |
| TRINITY_DN54729_c0_g2(MDAR2) | F:GAGGGGTTCGGATGCTGAAA | 129 |
|  | R:TCCATGCCAATGTACCCACC |
| TRINITY_DN56838_c1_g1(ABF2) | F:AAGGCGGAGGAGTTAGGGAT | 144 |
|  | R:CTGGTCTACTGGCCCAAAGG |
| TRINITY_DN7011_c0_g1(PYL3) | F:AACAGAAGCCCCTGCAGATC | 156 |
|  | R:TCGCTTCTTCACCGAACGAA |
| TRINITY_DN5063_c0_g1(PP2C) | F:CCCCATGTTGTTCTCCGTCA | 162 |
|  | R:TGGATCACCACGACACCTTG |
| TRINITY_DN52866_c0_g1(HSP70) | F:AACGACACCTCGACACAGAC | 170 |
|  | R:CTCAGACACGGACACGTCAA |
| TRINITY_DN66011_c1_g1(HSP90) | F：TCCCAGTCTCCTCCGCTATC | 111 |
|  | R:TGAACTGTAGACTGCCAACCG |
| TRINITY_DN44555_c0_g1(HSF2BC) | F:CATTGGTCTGTGGTCCGTCA | 123 |
|  | R:CGATCAGTGCCAATCTTGCG |
| TRINITY_DN43505_c0_g1(PAL) | F:CTTGGAGGAAGTGATCGGCA | 81 |
|  | R:TGCGATATCTTCAGGTCAGCC |

All annealing temperatures are 60℃
