# Supplementary material
Source: Research Square preprint supplement (doi:10.21203/rs.3.rs-9080835/v1)
Supplement: Supplementary file 2 [file 20e4b58f9532735a30f730ce.xlsx]

## Sheet: Sheet1
GeneID	0h	1h	3h	6h	9h	24h	func
TRINITY_DN14169_c0_g1(HSFC1)	2.74733	1.22233	1.48167	1.174	1.188	0.939667	Heat stress transcription factor C-1 OS=Arabidopsis thaliana OX=3702 GN=HSFC1 PE=1 SV=1
TRINITY_DN16128_c0_g1(HSFB1)	19.614	16.704	12.1747	16.8703	7.485	22.6563	Heat stress transcription factor B-1 OS=Oryza sativa subsp. japonica OX=39947 GN=HSFB1 PE=2 SV=1
TRINITY_DN16518_c0_g1(HSFA6b)	5.60933	5.486	10.4213	12.0403	12.3407	8.55567	Heat stress transcription factor A-6b OS=Arabidopsis thaliana OX=3702 GN=HSFA6b PE=2 SV=1
TRINITY_DN20889_c0_g1(HSFA6b)	2.34667	1.546	1.14	1.43633	1.27167	0.847667	Heat stress transcription factor A-6b OS=Arabidopsis thaliana OX=3702 GN=HSFA6b PE=2 SV=1
TRINITY_DN23603_c1_g1(HSFA5)	4.629	2.64133	3.51033	2.20967	1.402	2.118	Heat stress transcription factor A-5 OS=Oryza sativa subsp. japonica OX=39947 GN=HSFA5 PE=2 SV=1
TRINITY_DN23603_c1_g2(HSFA5)	0.972333	4.32933	5.268	3.99733	2.34867	7.75467	Heat stress transcription factor A-5 OS=Oryza sativa subsp. japonica OX=39947 GN=HSFA5 PE=2 SV=1
TRINITY_DN24419_c0_g1(HSFA5)	2.69267	2.77033	2.76567	2.73933	2.5	7.771	Heat stress transcription factor A-5 OS=Oryza sativa subsp. japonica OX=39947 GN=HSFA5 PE=2 SV=1
TRINITY_DN39426_c0_g1(HSFC1)	2.61567	2.214	2.949	2.753	4.80167	3.54767	Heat stress transcription factor C-1a OS=Oryza sativa subsp. japonica OX=39947 GN=HSFC1A PE=2 SV=2
TRINITY_DN41618_c0_g2(HSFA1a)	2.33667	2.262	3.274	2.547	1.76233	2.54567	Heat stress transcription factor A-1a OS=Arabidopsis thaliana OX=3702 GN=HSFA1A PE=1 SV=2
TRINITY_DN52095_c0_g1(HSFA5)	1.77033	1.754	1.616	1.51233	1.45033	2.704	Heat stress transcription factor A-5 OS=Arabidopsis thaliana OX=3702 GN=HSFA5 PE=2 SV=1
TRINITY_DN52172_c0_g1(HSFB1)	4.12433	3.645	2.35567	3.599	0.926	5.65533	Heat stress transcription factor B-1 OS=Oryza sativa subsp. japonica OX=39947 GN=HSFB1 PE=2 SV=1
TRINITY_DN57479_c0_g1(HSFA4a)	4.107	5.065	4.50933	5.94367	6.087	12.1063	Heat stress transcription factor A-4a OS=Arabidopsis thaliana OX=3702 GN=HSFA4A PE=2 SV=1
TRINITY_DN57479_c0_g2(HSFA4b)	4.31767	4.816	5.55433	5.13567	5.94067	6.58733	Heat stress transcription factor A-4b OS=Oryza sativa subsp. japonica OX=39947 GN=HSFA4B PE=2 SV=1
TRINITY_DN60959_c0_g1(HSFA5)	1.497	1.39067	1.443	1.51233	1.206	3.479	Heat stress transcription factor A-5 OS=Oryza sativa subsp. japonica OX=39947 GN=HSFA5 PE=2 SV=1
TRINITY_DN60959_c0_g2(HSFA5)	7.41067	9.411	9.90267	8.60833	5.82467	18.5867	Heat stress transcription factor A-5 OS=Oryza sativa subsp. japonica OX=39947 GN=HSFA5 PE=2 SV=1
TRINITY_DN63448_c0_g1(HSFB2c)	75.7337	47.3673	38.3077	37.4837	46.71	59.475	Heat stress transcription factor B-2c OS=Oryza sativa subsp. japonica OX=39947 GN=HSFB2C PE=2 SV=1
TRINITY_DN63448_c0_g2(HSFB2c)	47.5553	27.705	5.688	13.541	13.1827	14.594	Heat stress transcription factor B-2c OS=Oryza sativa subsp. japonica OX=39947 GN=HSFB2C PE=2 SV=1
TRINITY_DN64079_c1_g1(HSFA2b)	92.9933	88.3067	109.171	126.544	100.895	80.4057	Heat stress transcription factor A-2b OS=Oryza sativa subsp. japonica OX=39947 GN=HSFA2B PE=2 SV=1
TRINITY_DN65279_c3_g2(HSFA2b)	47.5333	17.9057	14.4923	21.9797	21.5157	18.1747	Heat stress transcription factor A-2b OS=Oryza sativa subsp. japonica OX=39947 GN=HSFA2B PE=2 SV=1
TRINITY_DN65279_c3_g3(HSFA2b)	25.0983	33.1723	42.8667	49.832	43.8943	39.5973	Heat stress transcription factor A-2b OS=Oryza sativa subsp. japonica OX=39947 GN=HSFA2B PE=2 SV=1
TRINITY_DN65279_c3_g4(HSFA2b)	22.958	22.0893	28.7277	20.9093	12.966	11.3627	Heat stress transcription factor A-2b OS=Oryza sativa subsp. japonica OX=39947 GN=HSFA2B PE=2 SV=1
TRINITY_DN65279_c3_g6(HSFA2b)	8.44767	6.20067	6.46467	8.82433	7.406	6.45367	Heat stress transcription factor A-2b OS=Oryza sativa subsp. japonica OX=39947 GN=HSFA2B PE=2 SV=1
TRINITY_DN66095_c1_g1(HSFA3)	28.8603	35.33	29.3137	49.5083	67.9923	73.5137	Heat stress transcription factor A-3 OS=Oryza sativa subsp. japonica OX=39947 GN=HSFA3 PE=2 SV=1
TRINITY_DN66450_c0_g2(HSFC1)	0.799	1.079	1.07867	0.932333	1.95033	1.25967	Heat stress transcription factor C-1 OS=Arabidopsis thaliana OX=3702 GN=HSFC1 PE=1 SV=1
TRINITY_DN66583_c4_g4(HSFA2b)	3.349	2.655	2.51267	3.31733	4.286	2.78667	Heat stress transcription factor A-2b OS=Oryza sativa subsp. japonica OX=39947 GN=HSFA2B PE=2 SV=1
TRINITY_DN66792_c0_g1(HSFA4b)	7.55767	8.44033	6.889	9.41133	9.431	24.913	Heat stress transcription factor A-4b OS=Oryza sativa subsp. japonica OX=39947 GN=HSFA4B PE=2 SV=1
TRINITY_DN66792_c1_g1(HSFA4b)	6.76167	5.36733	3.86	4.07933	3.70467	6.761	Heat stress transcription factor A-4b OS=Oryza sativa subsp. japonica OX=39947 GN=HSFA4B PE=2 SV=1
TRINITY_DN69870_c0_g2(HSFA1)	2.678	1.621	1.50367	1.68133	1.18567	1.55233	Heat stress transcription factor A-1 OS=Oryza sativa subsp. japonica OX=39947 GN=HSFA1 PE=2 SV=1
TRINITY_DN70262_c0_g1(HSFA1)	4.81533	2.90933	3.522	3.00533	2.88633	5.092	Heat stress transcription factor A-1 OS=Oryza sativa subsp. japonica OX=39947 GN=HSFA1 PE=2 SV=1
