# Supplementary material
Source: Research Square preprint supplement (doi:10.21203/rs.3.rs-9080835/v1)
Supplement: Supplementary file 5 [file b79e0e68c08fdeb5868ac007.xlsx]

## Sheet: Sheet1
GeneID	0h	1h	3h	6h	9h	24h	func
TRINITY_DN33766_c0_g1（ABF3）	3.76951	10.1503	16.1948	12.6925	12.205	13.085	ABSCISIC ACID-INSENSITIVE 5-like protein 6 OS=Arabidopsis thaliana OX=3702 GN=ABF3 PE=1 SV=1
TRINITY_DN56838_c1_g1(ABF2)	3.68345	3.13379	3.04371	9.54928	4.18796	3.23673	ABSCISIC ACID-INSENSITIVE 5-like protein 5 OS=Arabidopsis thaliana OX=3702 GN=ABF2 PE=1 SV=1
TRINITY_DN56838_c1_g3(ABF3)	1.24984	0.803995	0.990201	1.14099	0.826374	0.680412	ABSCISIC ACID-INSENSITIVE 5-like protein 5 OS=Arabidopsis thaliana OX=3702 GN=ABF2 PE=1 SV=1
TRINITY_DN44551_c0_g3(PP2C)	12.0264	5.63506	5.25771	13.524	7.94744	15.3196	Protein phosphatase 2C 37 OS=Arabidopsis thaliana OX=3702 GN=PP2CA PE=1 SV=1
TRINITY_DN48545_c0_g1(PP2C)	4.38564	0.90987	0.826741	5.6419	4.41583	6.03869	Protein phosphatase 2C 37 OS=Arabidopsis thaliana OX=3702 GN=PP2CA PE=1 SV=1
TRINITY_DN83622_c0_g1(PP2C)	15.8312	12.1949	12.0828	12.4323	10.3275	17.258	Protein phosphatase 2C 53 OS=Oryza sativa subsp. japonica OX=39947 GN=PP2C53 PE=1 SV=1
TRINITY_DN85063_c0_g1(PP2C)	18.2126	9.70726	7.13707	8.93703	6.52603	7.72947	Protein kinase and PP2C-like domain-containing protein OS=Oryza sativa subsp. japonica OX=39947 GN=Os01g0541900 PE=2 SV=1
TRINITY_DN30488_c0_g1(PYL9)	0	0	0	1.94496	0	0	Abscisic acid receptor PYL9 OS=Arabidopsis thaliana OX=3702 GN=PYL9 PE=1 SV=1
TRINITY_DN58402_c0_g1(PYL3)	1.72944	2.99007	3.50472	3.18821	5.86716	10.1465	Abscisic acid receptor PYL3 OS=Oryza sativa subsp. japonica OX=39947 GN=PYL3 PE=1 SV=1
TRINITY_DN64567_c1_g2(PYL3)	17.4925	15.4387	19.9599	16.3912	17.4839	11.2276	Abscisic acid receptor PYL3 OS=Oryza sativa subsp. japonica OX=39947 GN=PYL3 PE=1 SV=1
TRINITY_DN70111_c2_g6(PYL3)	7.51209	5.97958	10.6928	5.30886	9.2366	17.6327	Abscisic acid receptor PYL3 OS=Oryza sativa subsp. japonica OX=39947 GN=PYL3 PE=1 SV=1
TRINITY_DN38148_c0_g1(CYP707A7)	0.482728	0.439855	0.750516	1.54182	0.976988	0.996766	Abscisic acid 8'-hydroxylase 3 OS=Oryza sativa subsp. japonica OX=39947 GN=CYP707A7 PE=2 SV=1
TRINITY_DN42112_c0_g1(CYP707A2)	1.06392	1.89371	1.85109	2.36727	1.58014	2.17991	Abscisic acid 8'-hydroxylase CYP707A2 OS=Solanum lycopersicum OX=4081 GN=CYP707A2 PE=2 SV=1
TRINITY_DN43728_c0_g1(CYP707A3)	4.93819	3.08448	2.05705	1.68653	1.88945	2.27433	Abscisic acid 8'-hydroxylase 3 OS=Arabidopsis thaliana OX=3702 GN=CYP707A3 PE=1 SV=1
TRINITY_DN56628_c0_g1(DPBF3)	3.05213	2.47698	3.88342	2.05636	2.68986	0.963531	ABSCISIC ACID-INSENSITIVE 5-like protein 2 OS=Arabidopsis thaliana OX=3702 GN=DPBF3 PE=1 SV=1
TRINITY_DN65870_c1_g5(DPBF3)	5.09552	4.9596	5.1915	4.59941	3.86693	6.09763	ABSCISIC ACID-INSENSITIVE 5-like protein 2 OS=Arabidopsis thaliana OX=3702 GN=DPBF3 PE=1 SV=1
TRINITY_DN66096_c0_g3(DPBF3)	1.06435	0.957659	1.37956	1.13394	1.25273	1.55925	ABSCISIC ACID-INSENSITIVE 5-like protein 2 OS=Arabidopsis thaliana OX=3702 GN=DPBF3 PE=1 SV=1
TRINITY_DN71511_c0_g1(CYP707A2)	1.84736	0.684432	1.55674	1.29422	0.452621	2.01264	Abscisic acid 8'-hydroxylase CYP707A2 OS=Solanum lycopersicum OX=4081 GN=CYP707A2 PE=2 SV=1
TRINITY_DN71511_c3_g10(CYP707A2)	1.42314	0.658143	1.21331	2.31485	1.61061	2.60502	Abscisic acid 8'-hydroxylase CYP707A2 OS=Solanum lycopersicum OX=4081 GN=CYP707A2 PE=2 SV=1
TRINITY_DN7849_c0_g1(CYP707A7)	2.51045	1.42886	1.69664	1.7288	1.35654	3.88434	Abscisic acid 8'-hydroxylase 3 OS=Oryza sativa subsp. japonica OX=39947 GN=CYP707A7 PE=2 SV=1
