# Supplementary material
Source: Research Square preprint supplement (doi:10.21203/rs.3.rs-9080835/v1)

| 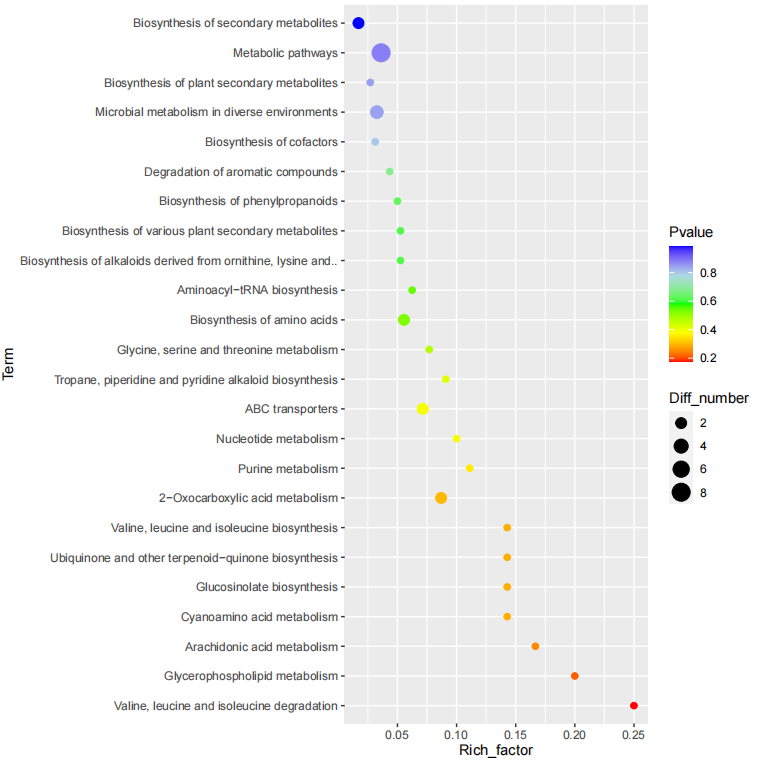 |
| --- |
| B VS A |
| 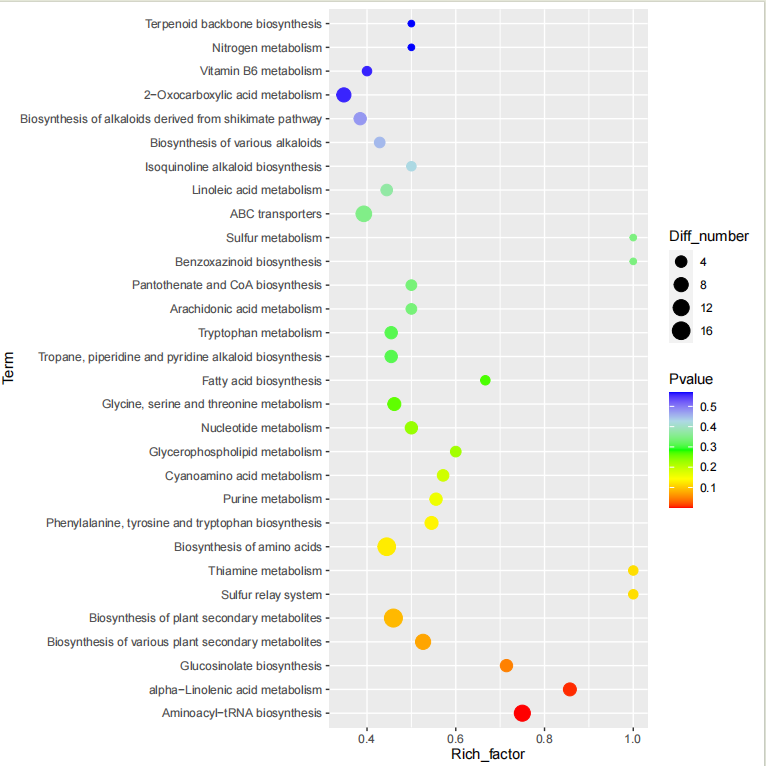 |
| C vs A |
| 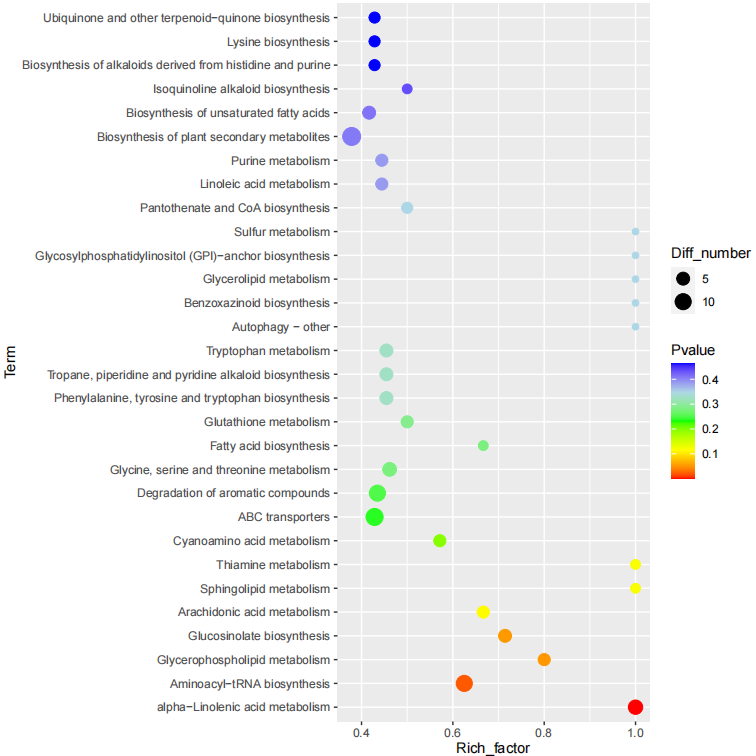 |
| D vs A |
| 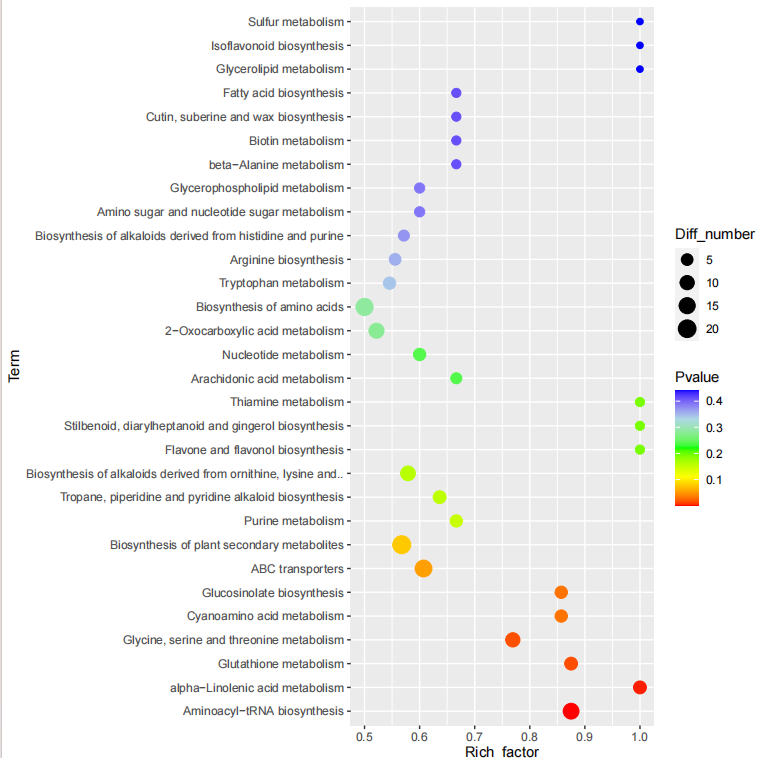 |
| E vs A |
| 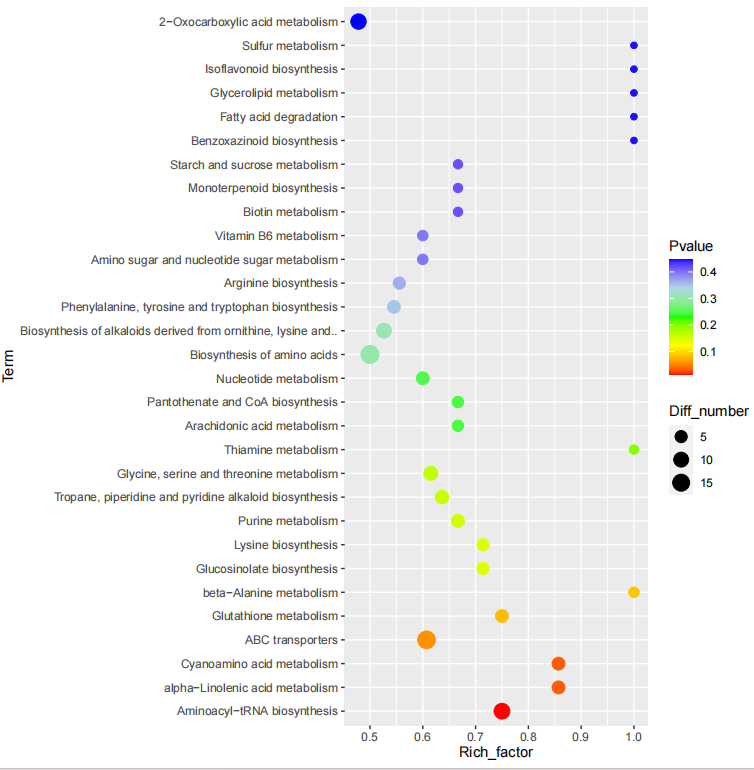 |
| F vs A |

Supplement: Supplementary file 2 [file a5b06dc54948e2e6c5b69354.docx]

| 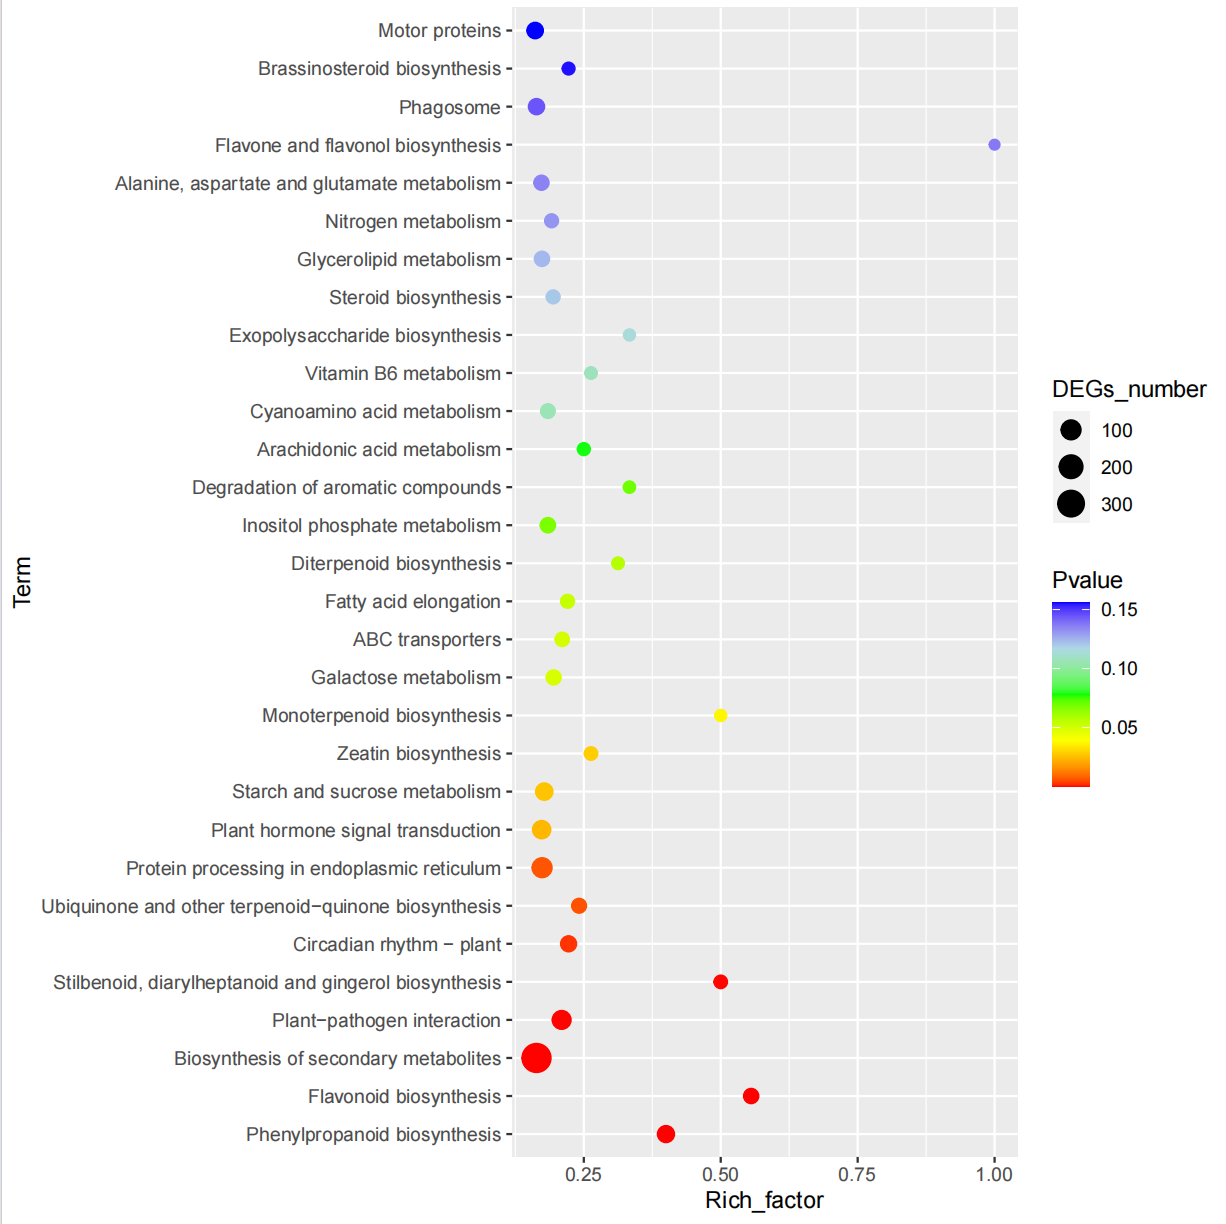 |
| --- |
| B VS A |
| 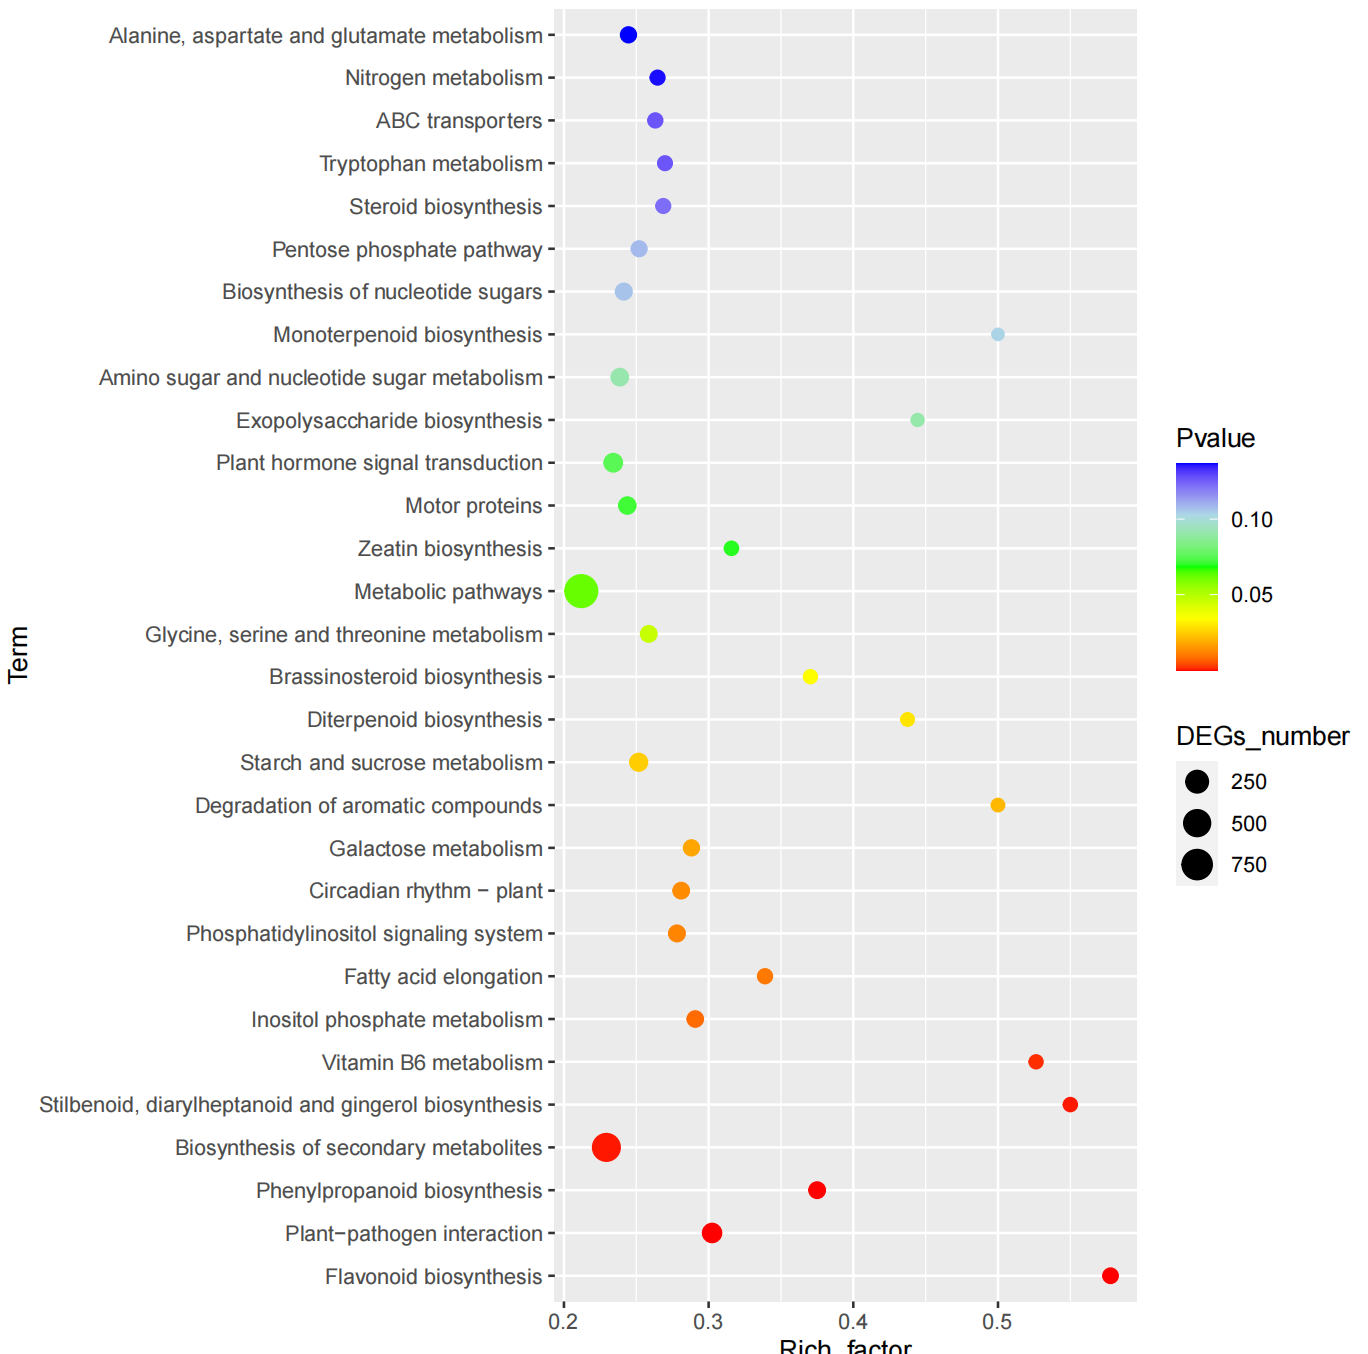 |
| C vs A |
| 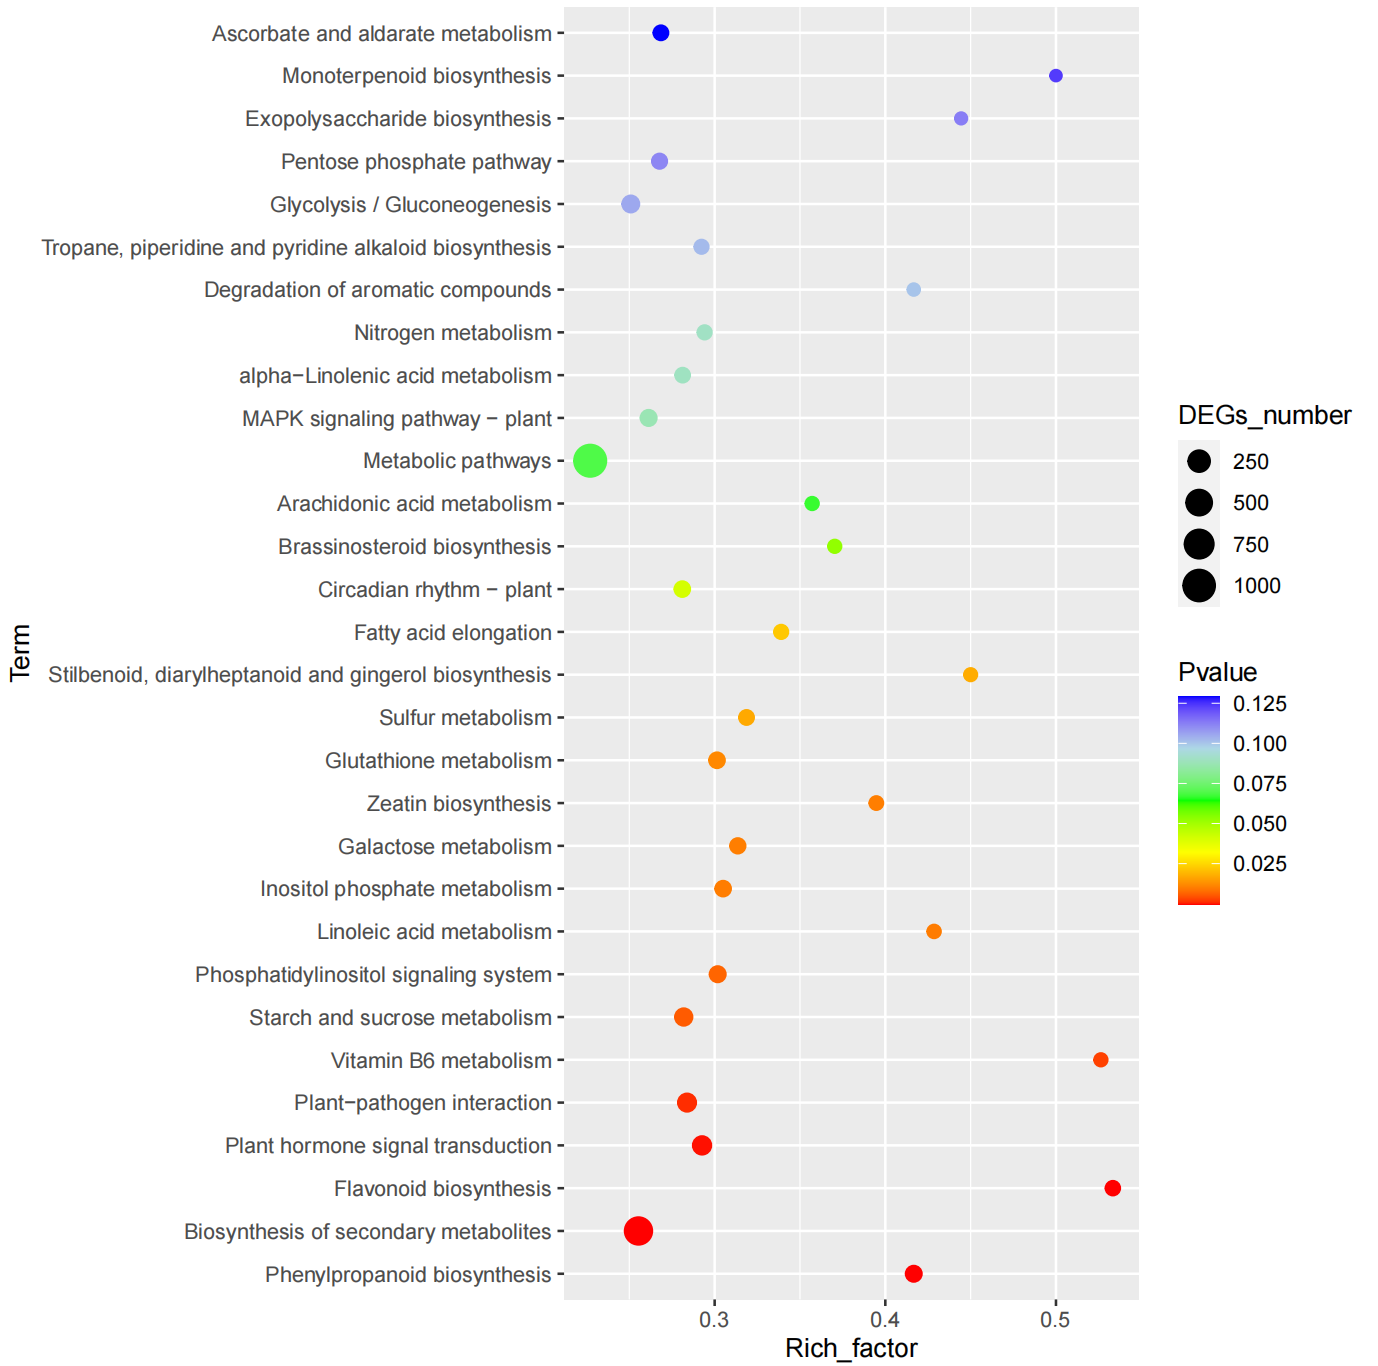 |
| D vs A |
| 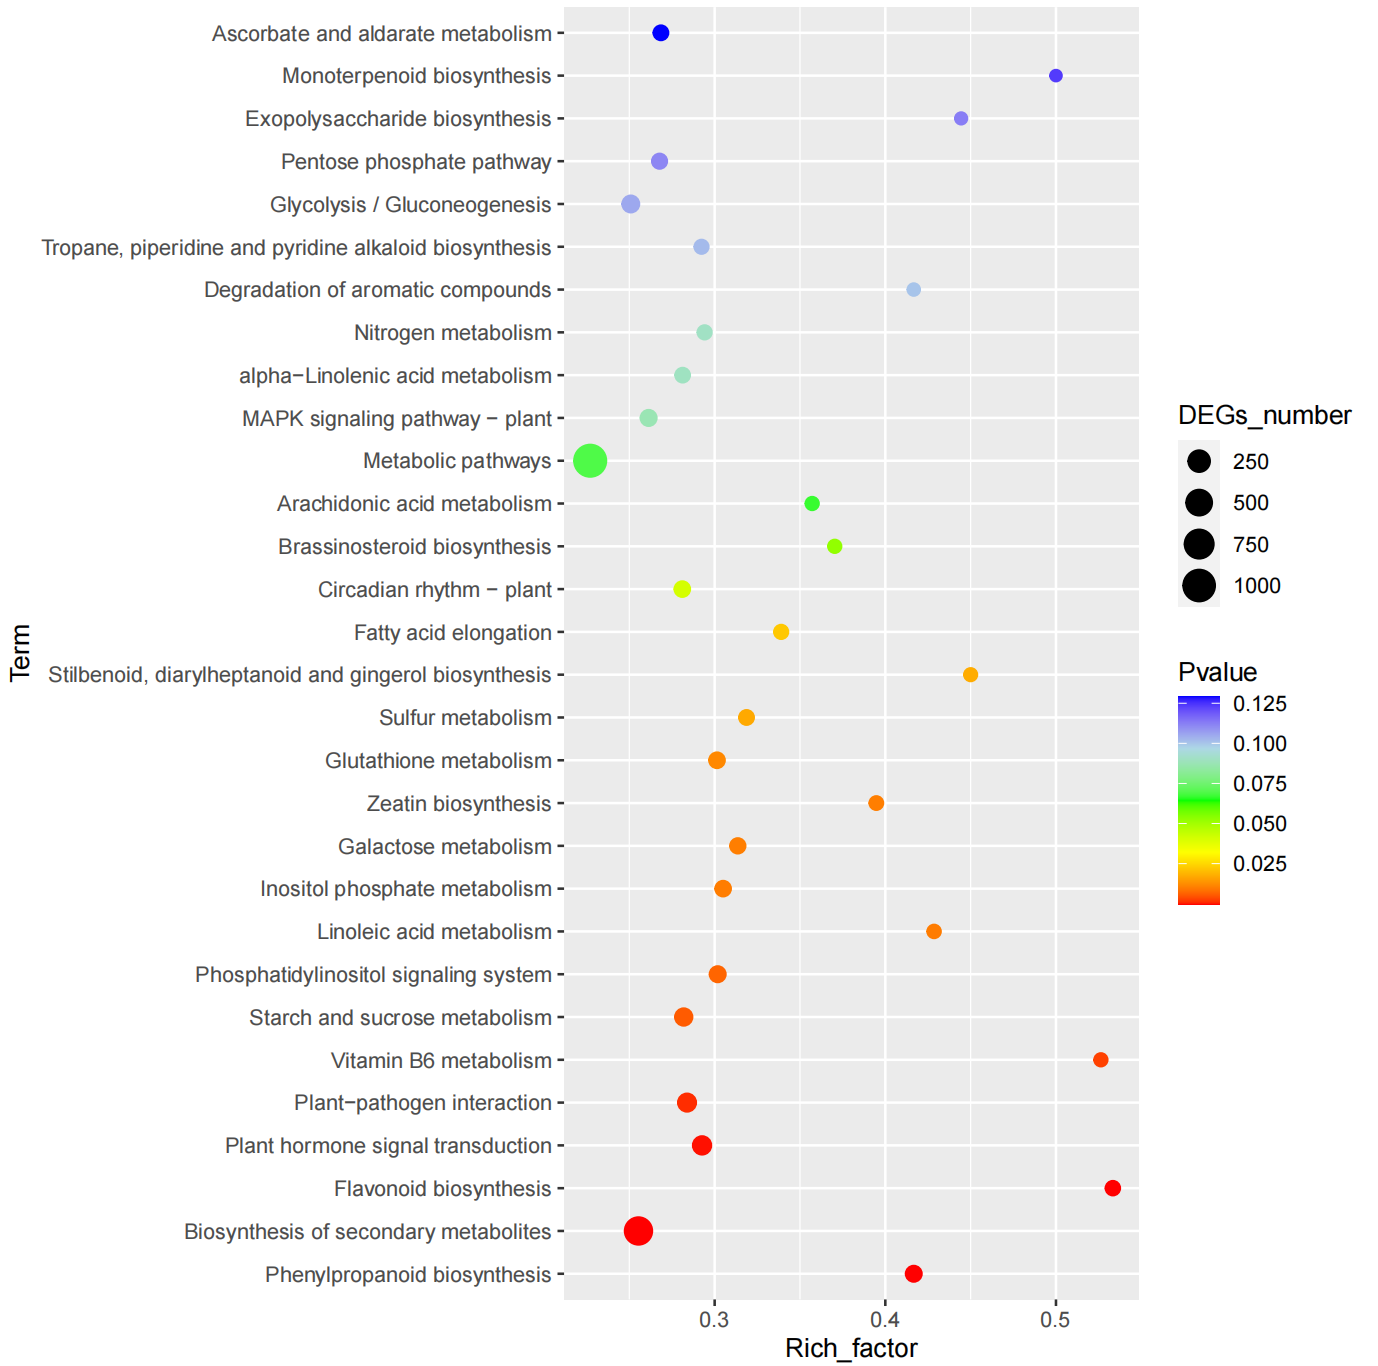 |
| E vs A |
| 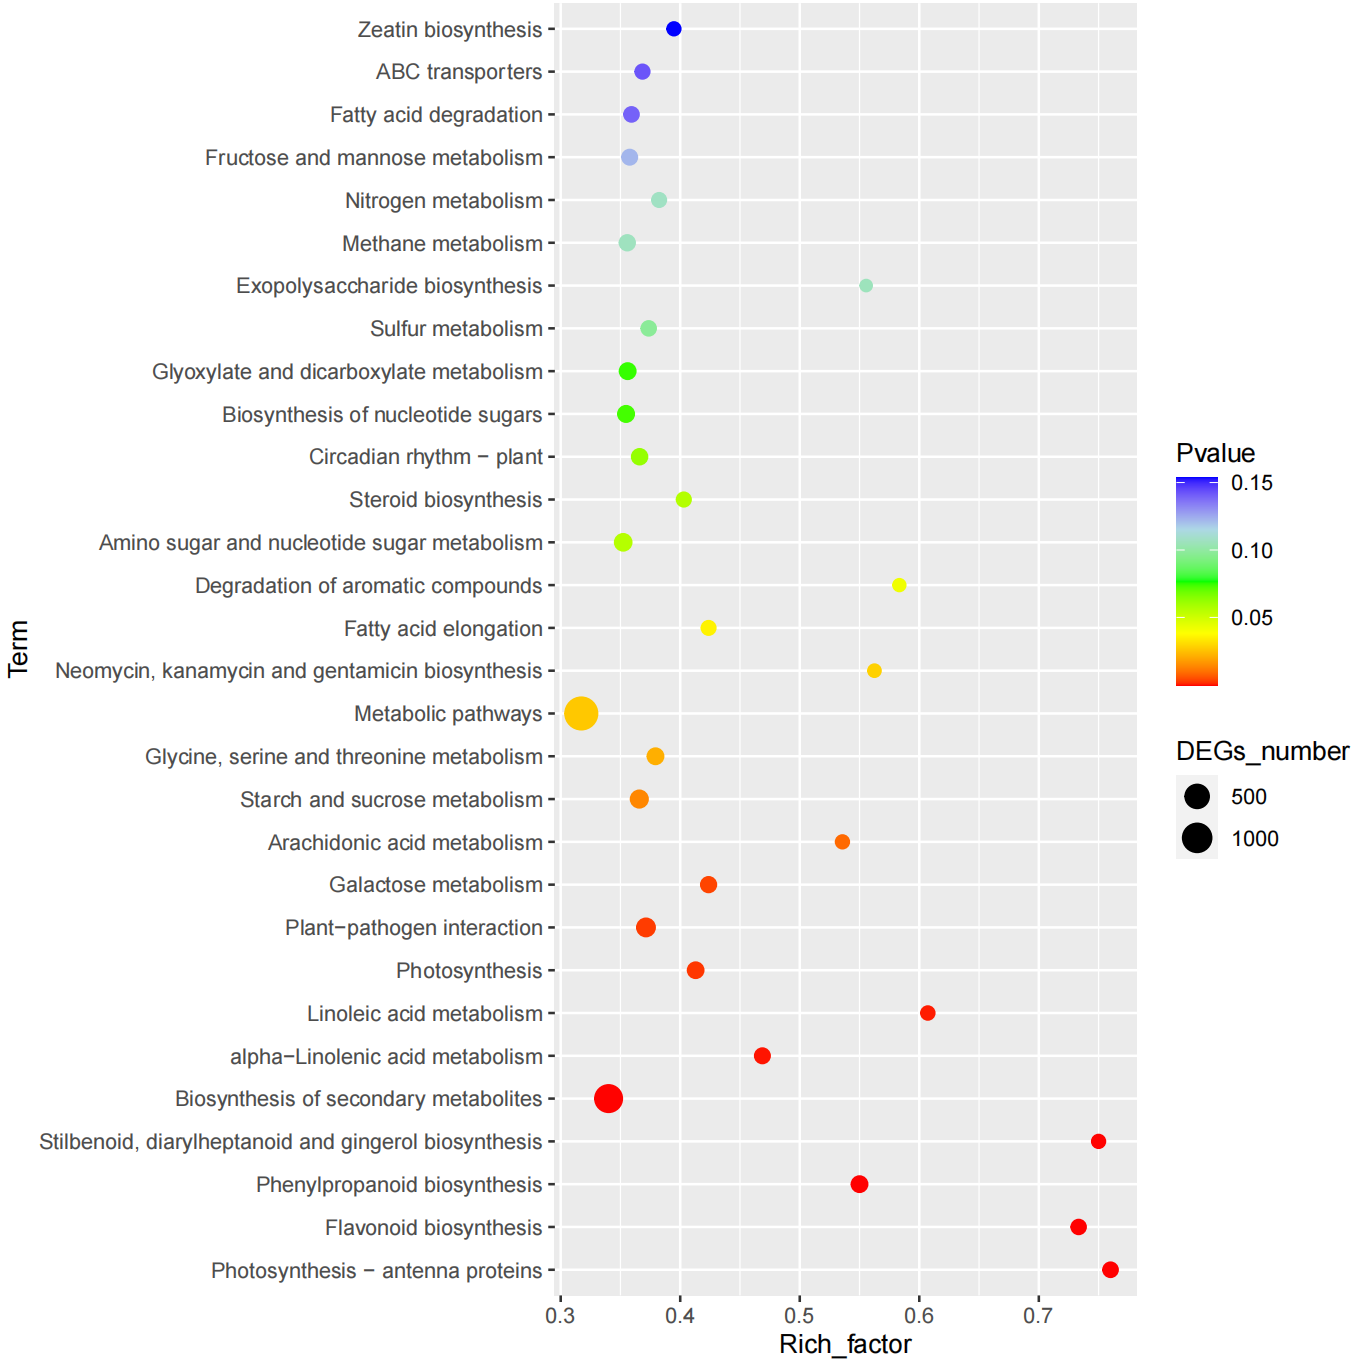 |
| F vs A |

Supplement: Supplementary file 3 [file d34b09ea2f74f07bc4d58dc0.docx]

| 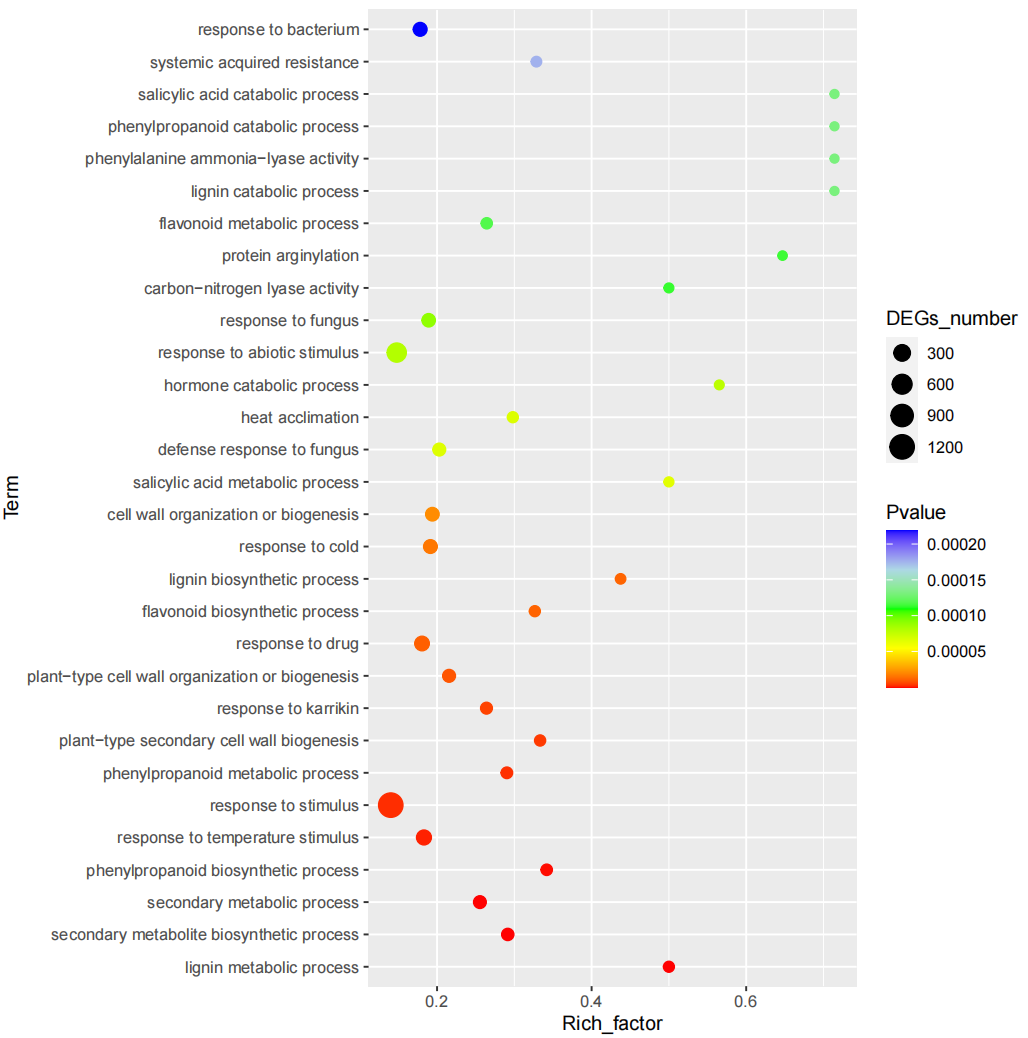 |
| --- |
| B VS A |
| 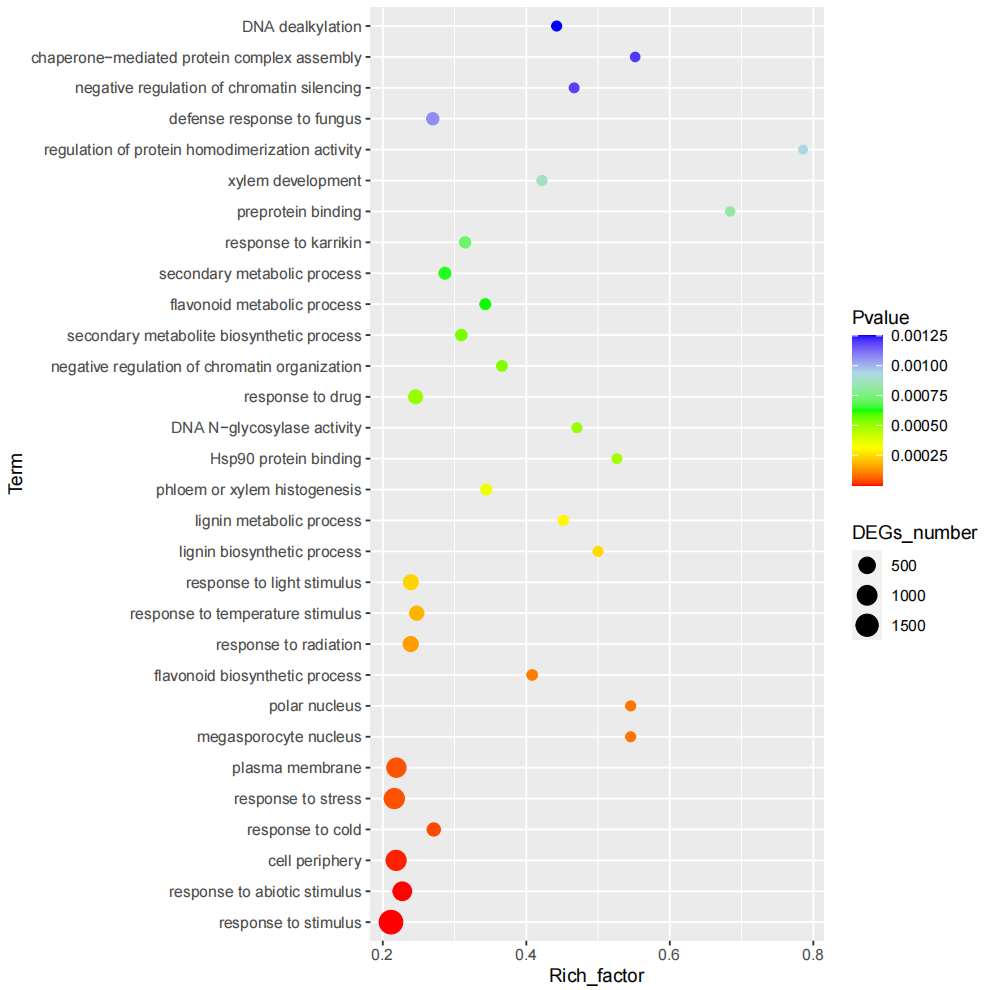 |
| C vs A |
| 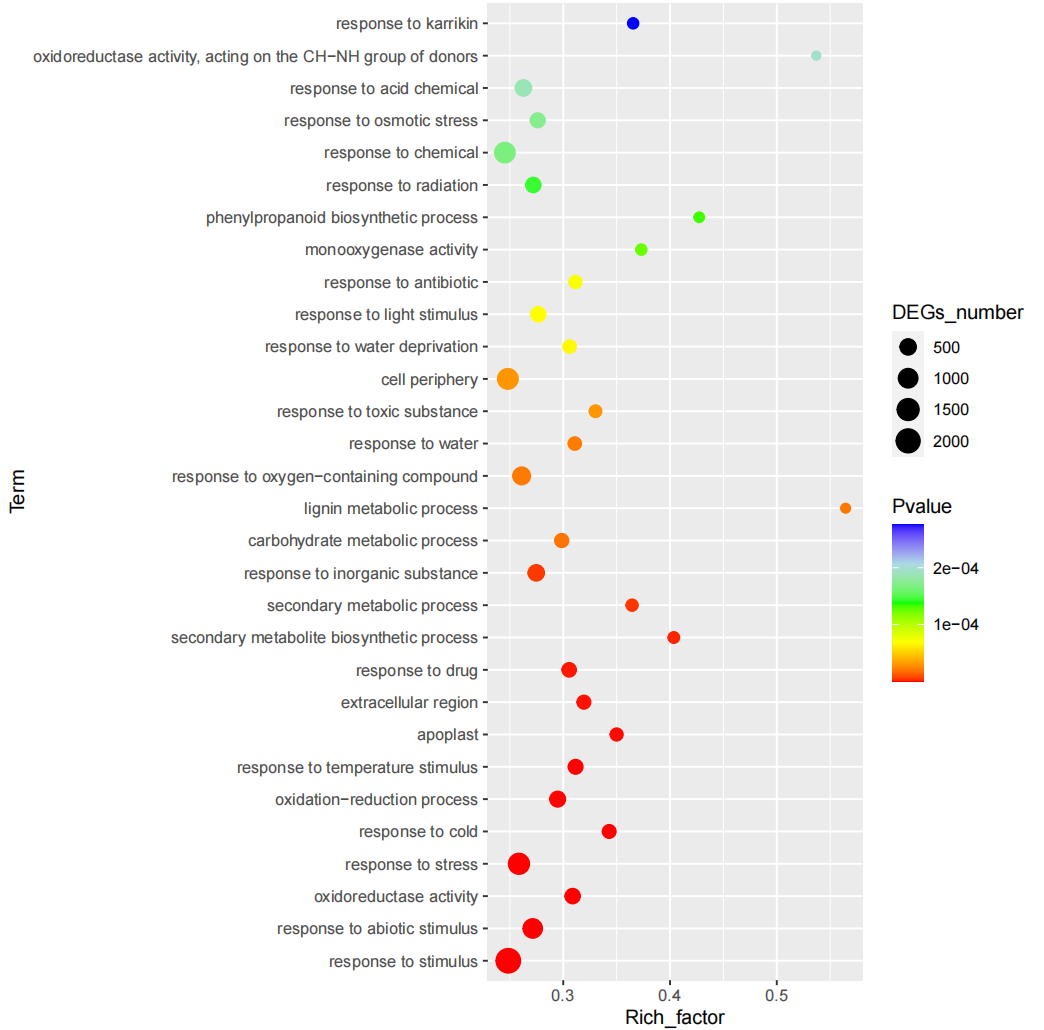 |
| Dvs A |
| 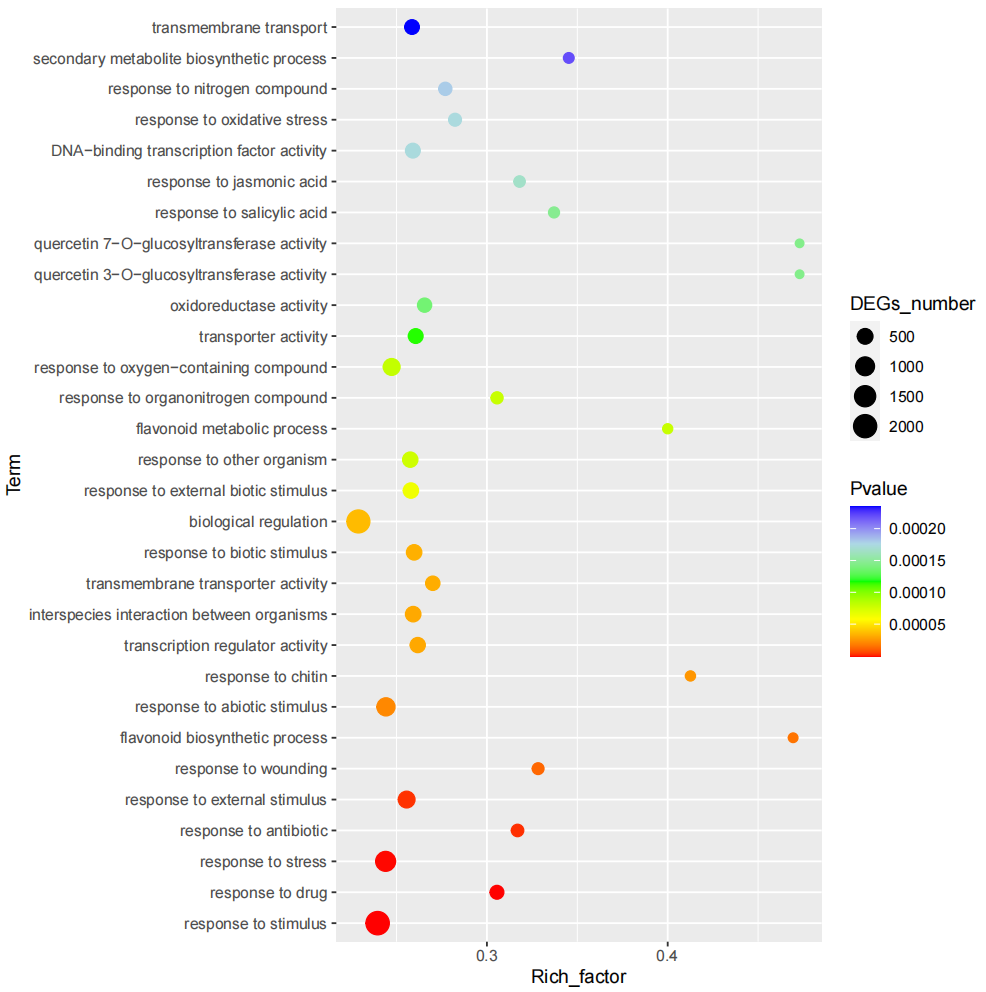 |
| E vs A |
| 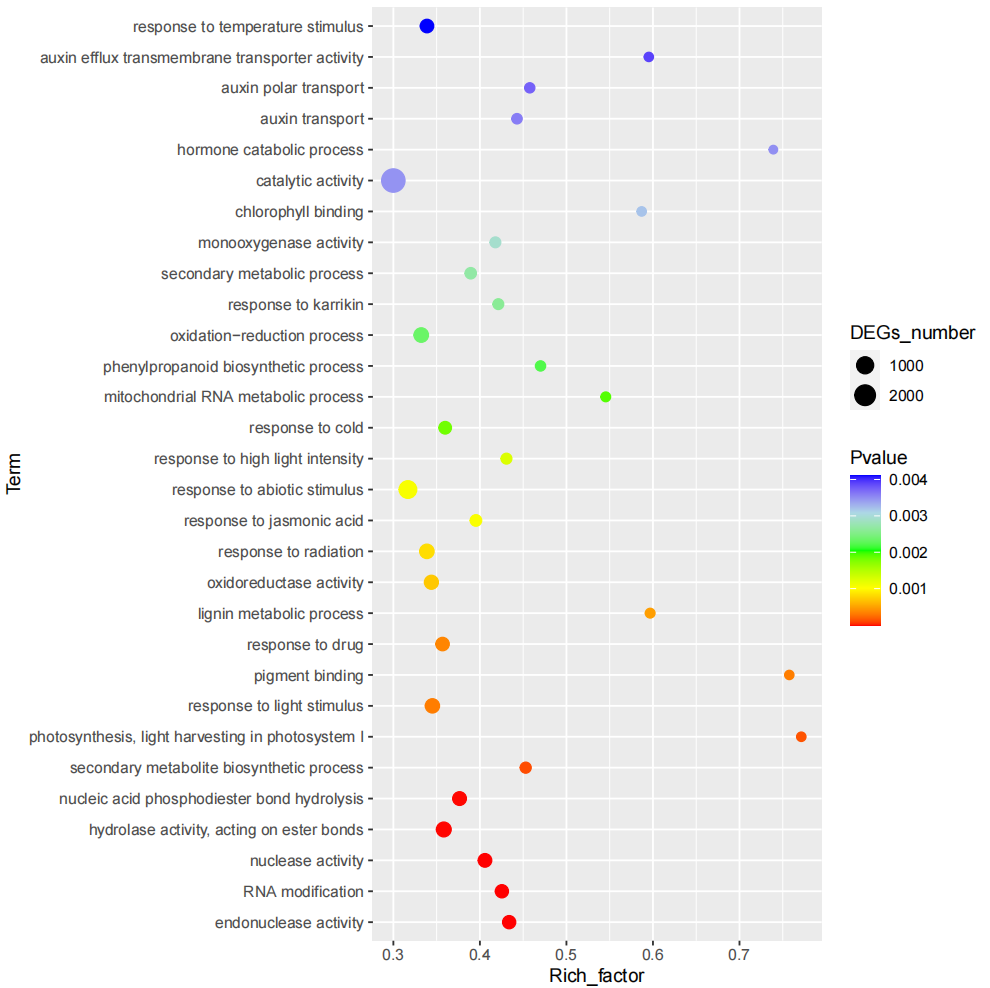 |
| F vs A |

Supplement: Supplementary file 4 [file ed0b8ce3d93435084573fb8b.docx]
